# Supplementary material
Source: MDPI journal article supplement (https://www.mdpi.com/2227-9717/9/6/1004)
Supplement: s1 [file s1]

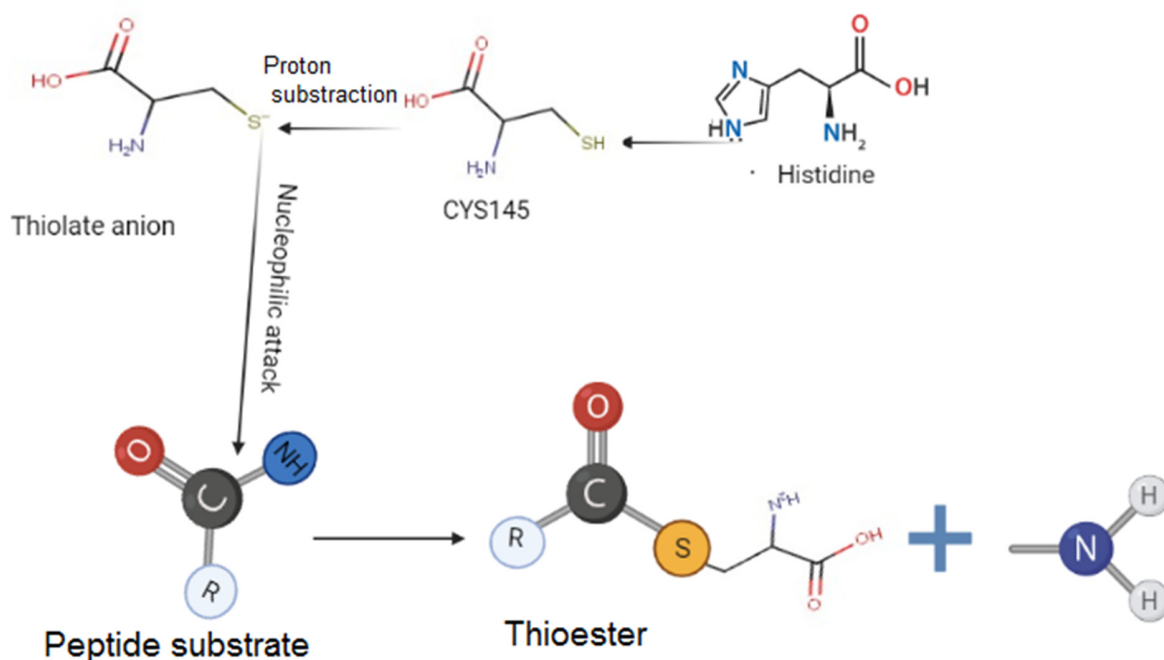

**Figure S1.** Molecular mechanism of SARS-COV-2 Mpro.

**Table S1.** Types of interactions of **RMH148** within COVID-19 Mpro active site, and distance (Å°).

| Bond type                                    | Distance<br>Å° | Bond type                                 | Distance<br>Å° |
|----------------------------------------------|----------------|-------------------------------------------|----------------|
| Hydrogen bond with Tyrosine54                | 3.21           | Hydrogen bond with Threonine 26           | 2.41           |
| Hydrogen bond with Glutamic166               | 3.00           | Hydrogen bond with Threonine 26           | 2.46           |
| Hydrogen bond with Glutamic166               | 3.07           | Hydrogen bond with Histidine 41           | 2.92           |
| Hydrogen bond with Glutamic166               | 3.22           | Hydrogen bond with Histidine 164          | 2.87           |
| Hydrogen bond with Glutamic166               | 3.29           | Hydrogen bond with Cysteine 145           | 2.75           |
| Hydrogen bond with Glutamic166               | 3.05           | Covalent bond with Cysteine 145           |                |
| Hydrogen bond with Glutamic166               | 3.02           | Hydrogen bond with water 566              | 3.13           |
| Non-classical Hydrogen bond with Glutamic166 | 3.15           | Hydrogen bond with water 566              | 3.39           |
| Hydrogen bond with Phenylalanine 140         | 3.20           | Hydrogen bond with water 568              | 3.16           |
|                                              | 3.20           | Hydrogen bond with water 568              | 3.52           |
|                                              | 3.23           | Pi-Alkyl interaction with Methionine 49   | 5.22           |
|                                              |                | Pi-Sulfur interaction with Methionine 165 | 5.28           |

|                                |  |  |  |
|--------------------------------|--|--|--|
| Hydrogen bond with Serine 144  |  |  |  |
| Hydrogen bond with Serine 144  |  |  |  |
| Hydrogen bond with Glycine 143 |  |  |  |
| Hydrogen bond with Glycine 143 |  |  |  |

**Table S2.** The average distances of all the hydrogen bonds formed between the **RMH148** and Covid-19 Mpro through the entire 150 ns MD simulation.

| Hydrogen bond name                   | Average distance (Å) +/- SD |
|--------------------------------------|-----------------------------|
| Hydrogen bond with Tyrosine54        | 3.17+/- 0.06                |
| Hydrogen bond with Glutamic166       | 3.05 +/- 0.12               |
| Hydrogen bond with Glutamic166       | 3.05 +/- 0.08               |
| Hydrogen bond with Glutamic166       | 3.21 +/- 0.1                |
| Hydrogen bond with Glutamic166       | 3.31 +/- 0.12               |
| Hydrogen bond with Phenylalanine 140 | 2.98 +/- 0.07               |
| Hydrogen bond with Serine 144        | 3.17 +/- 0.11               |
| Hydrogen bond with Serine 144        | 3.18 +/- 0.09               |
| Hydrogen bond with Glycine 143       | 3.25 +/- 0.15               |
| Hydrogen bond with Glycine 143       | 3.29 +/- 0.13               |
| Hydrogen bond with Threonine 26      | 2.43 +/- 0.04               |
| Hydrogen bond with Threonine 26      | 2.58 +/- 0.17               |
| Hydrogen bond with Histidine 41      | 3.02 +/- 0.14               |
| Hydrogen bond with Histidine 164     | 3.00 +/- 0.16               |
| Hydrogen bond with Cysteine 145      | 2.71 +/- 0.07               |

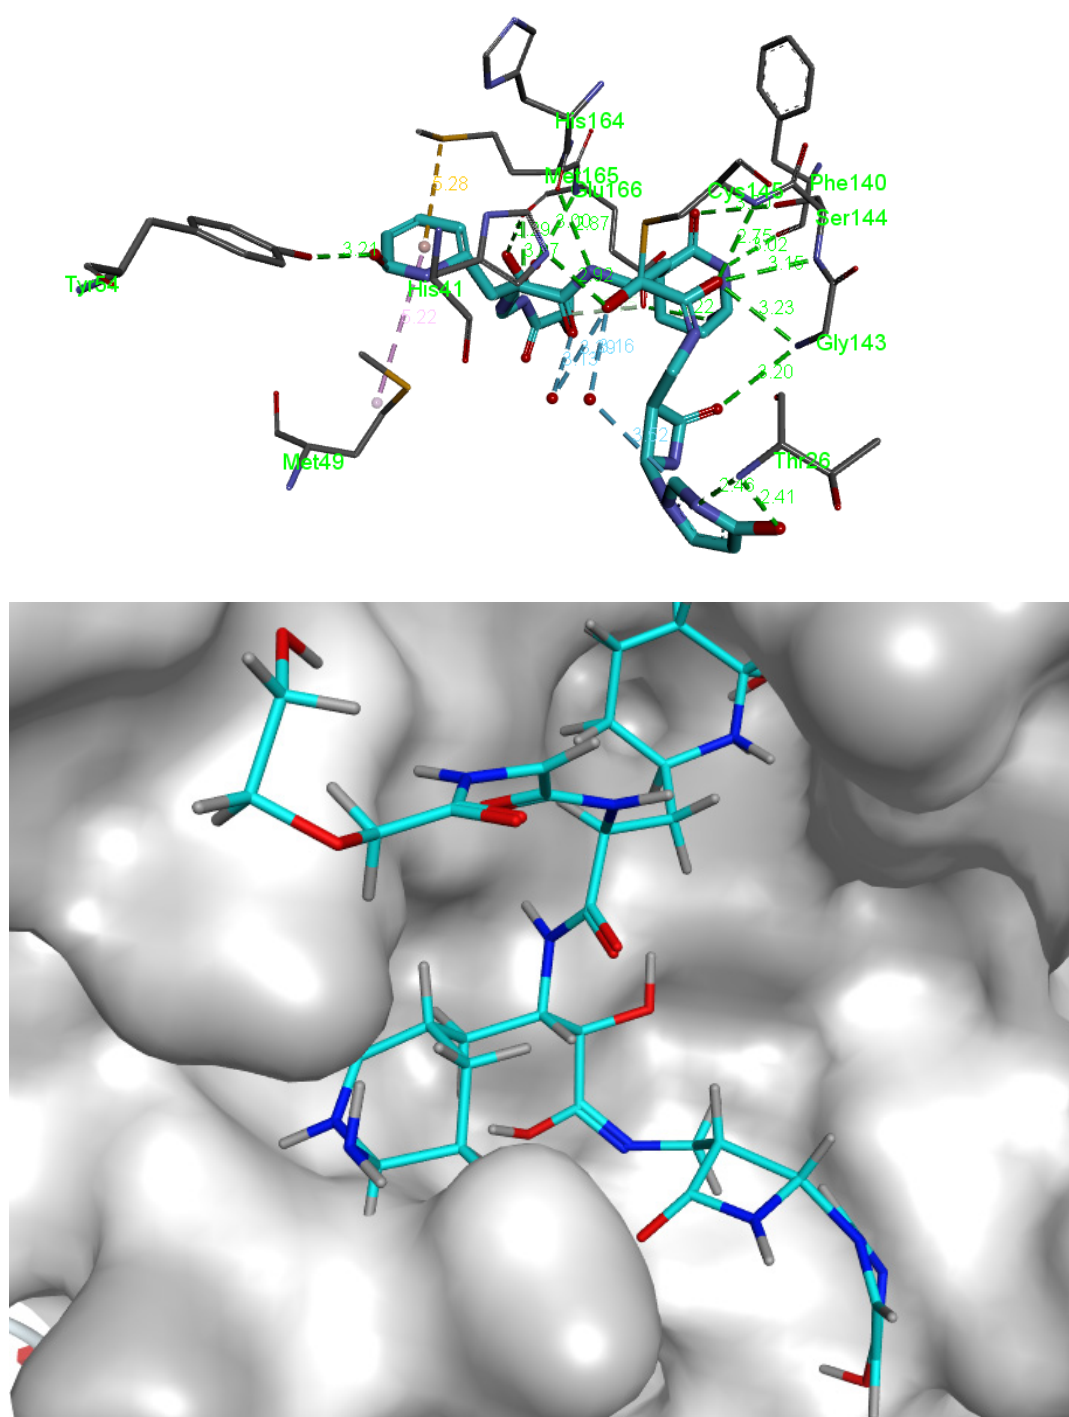

**Figure S2.** different 3D binding Views for RMH148 with the Mpro.

A.

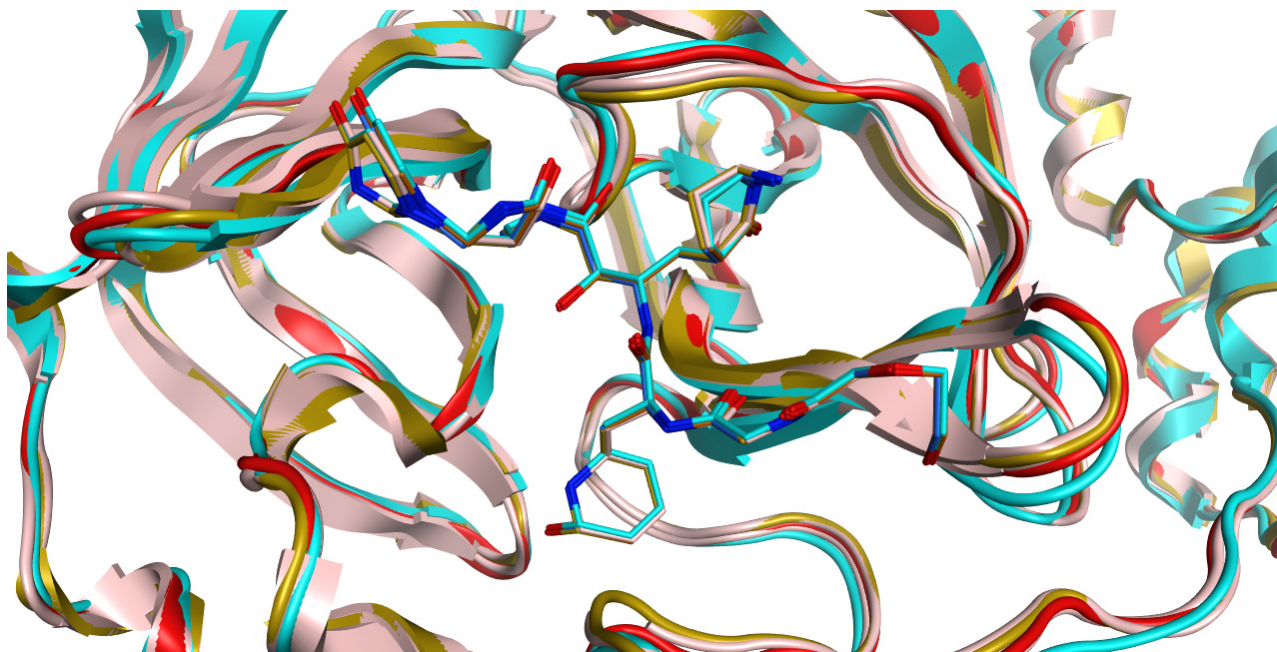

B.

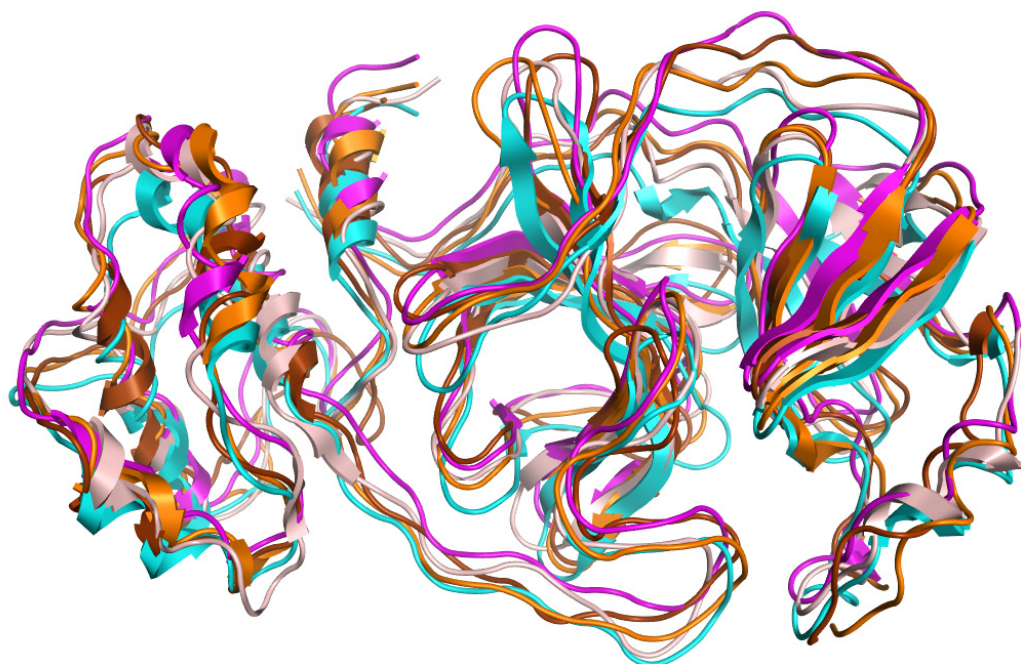

**Figure S3.** Five Conformational Samples showing (A) stable Mpro-RMH148 (B) dynamic free Mpro.
